# Supplementary material for: Tailoring Band Gap and Light Absorption in M-TiNT (M= Cu2+, Ni2+, Co2+ and Fe3+) for Water Remediation
Source: Research Square preprint supplement (doi:10.21203/rs.3.rs-7013762/v1), 2025-07-25
Supplement: Supplementary file 1 [file 1897f53d86e75e3222401c95.docx]

Electronic Supplementary Information

Tailoring Band Gap and Light Absorption in M-TiNT (M= Cu2+, Ni2+, Co2+ and Fe3+) for Water Remediation

**Melissa Méndez-Galván*, César L. Ordoñez-Romero, Hugo A. Lara-García* and Gabriela Díaz***

*a Instituto de Física, Depto. Física Química, Universidad Nacional Autónoma de México, Cd. Universitaria, A.P. 20-364, 01000 CDMX, México. Email:* [*hugo.lara@fisica.unam.mx*](mailto:hugo.lara@fisica.unam.mx)

Corresponding Author: Hugo A. Lara-García


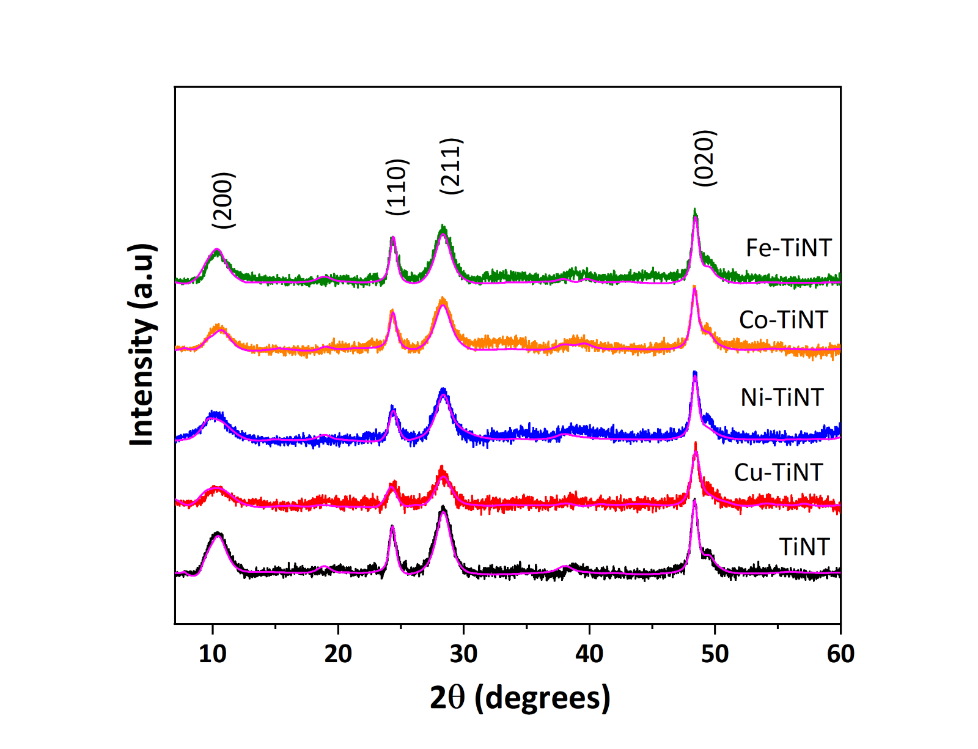


Figure S1. Experimental XRD patterns and smoothed-free background XRD patterns by Rietveld refinement of as-prepared TiNT.


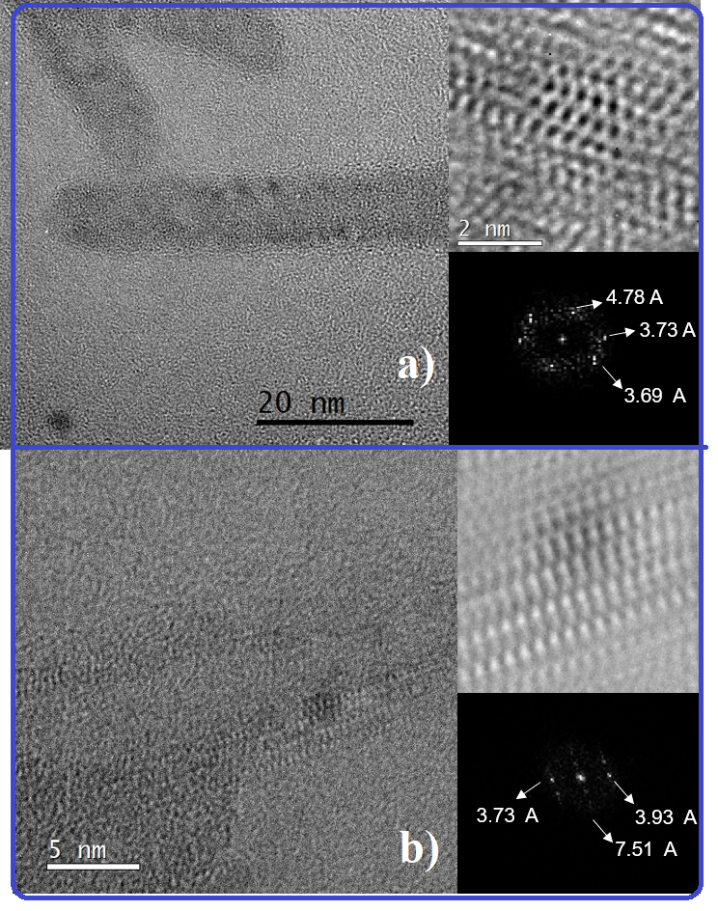


Figure S2. Representative HRTEM image of: (a) Ni-TiNT, showing nucleated nanoparticles on the walls of the TiNT, and (b) Co-TiNT presenting a moiré pattern.


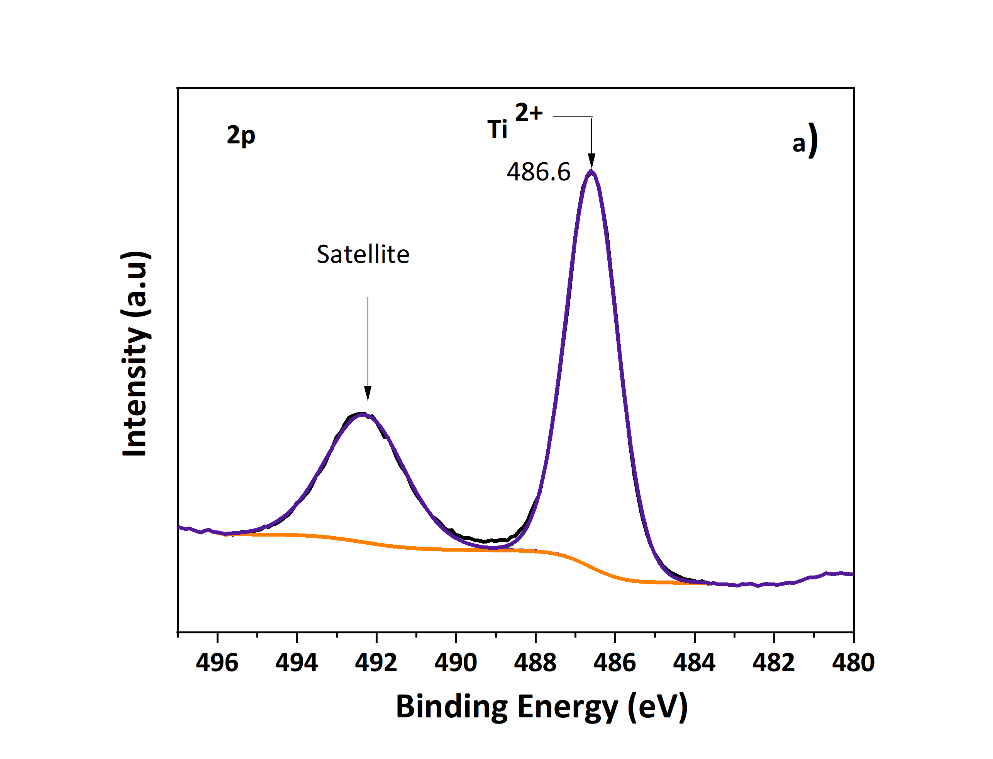


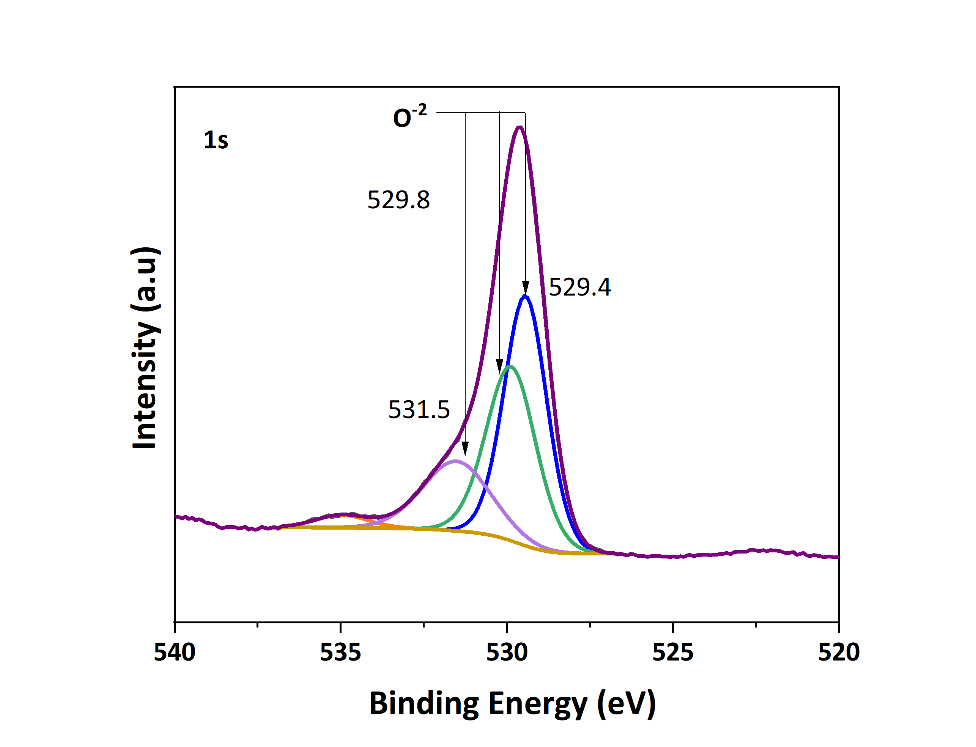


Figure S3. a) XPS spectra and fitting curves of 2p Ti, and b) 1s Oregions of the TiNT.


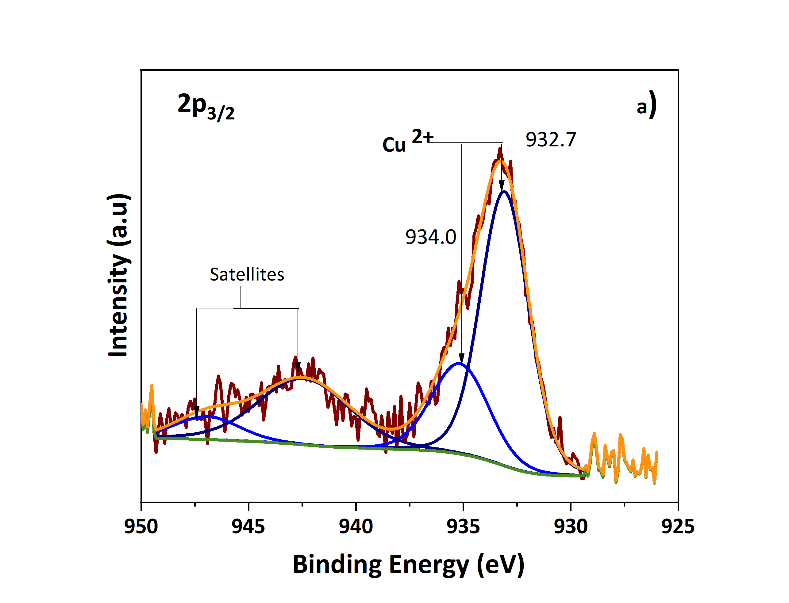

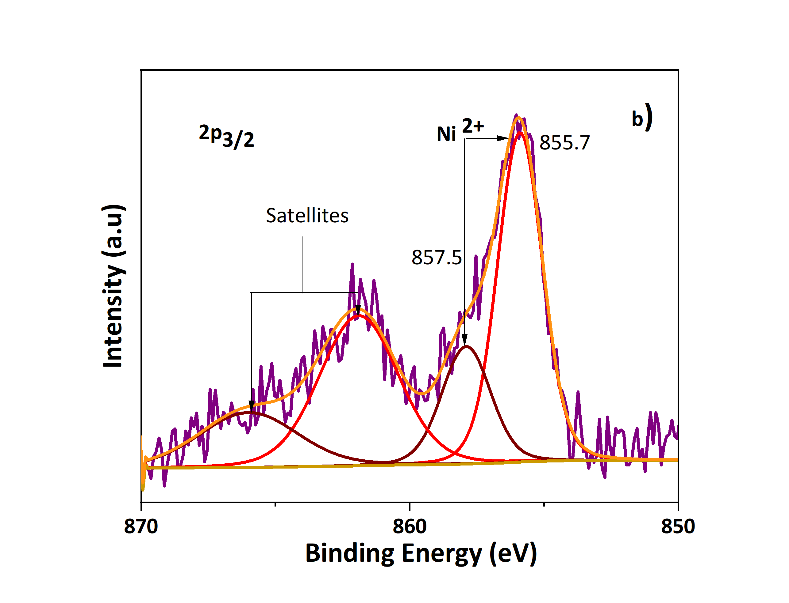

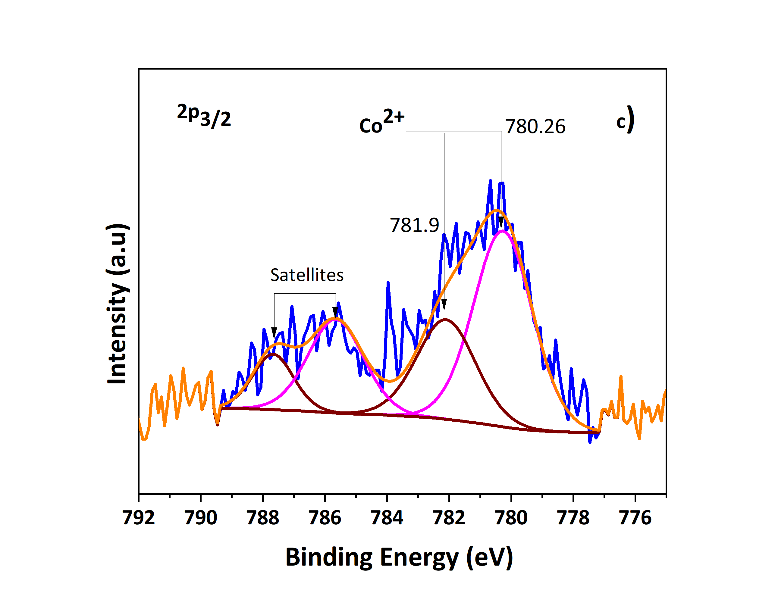

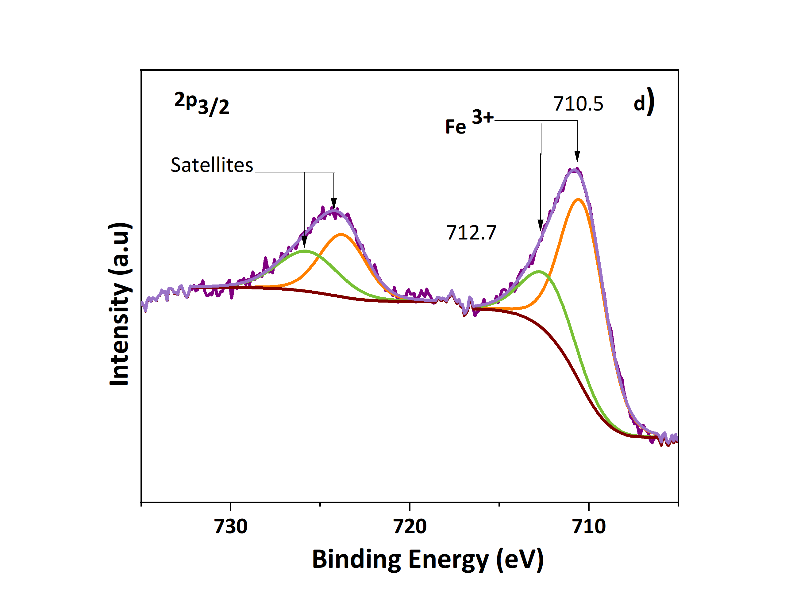


Figure S4. XPS spectra and fitting curves of Cu, Ni, Co and Fe 2p3/2 region (a) Cu-TiNT, (b) Ni-TiNT, (c) Co-TiNT and (d) Fe-TiNT.


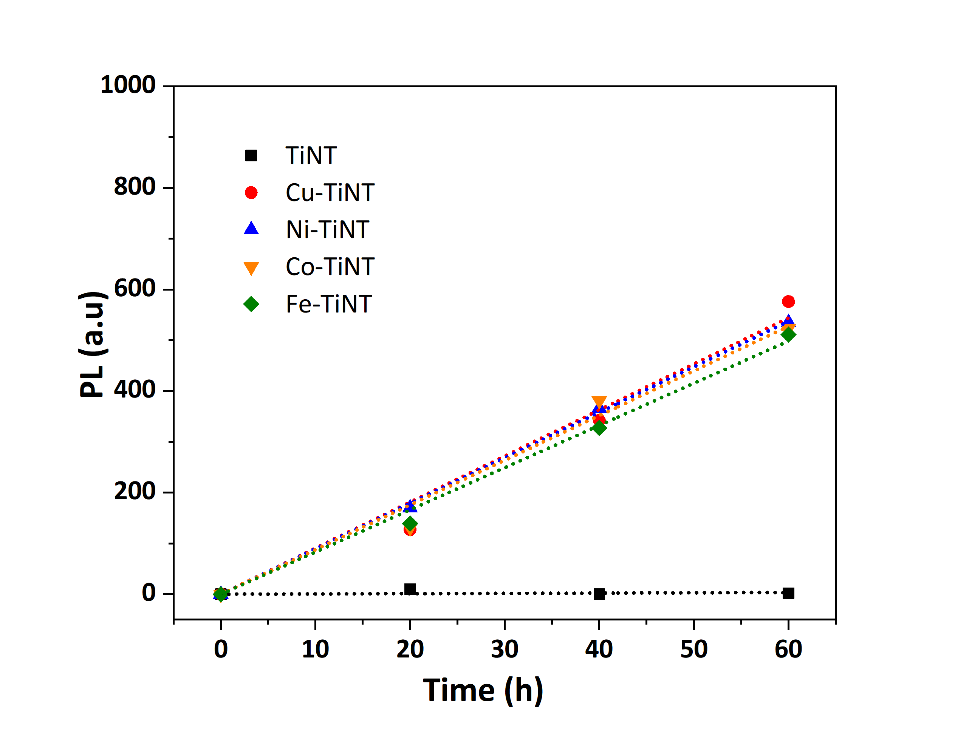


Figure S5. PL intensity as a function of the •OH radical concentration, under visible light.


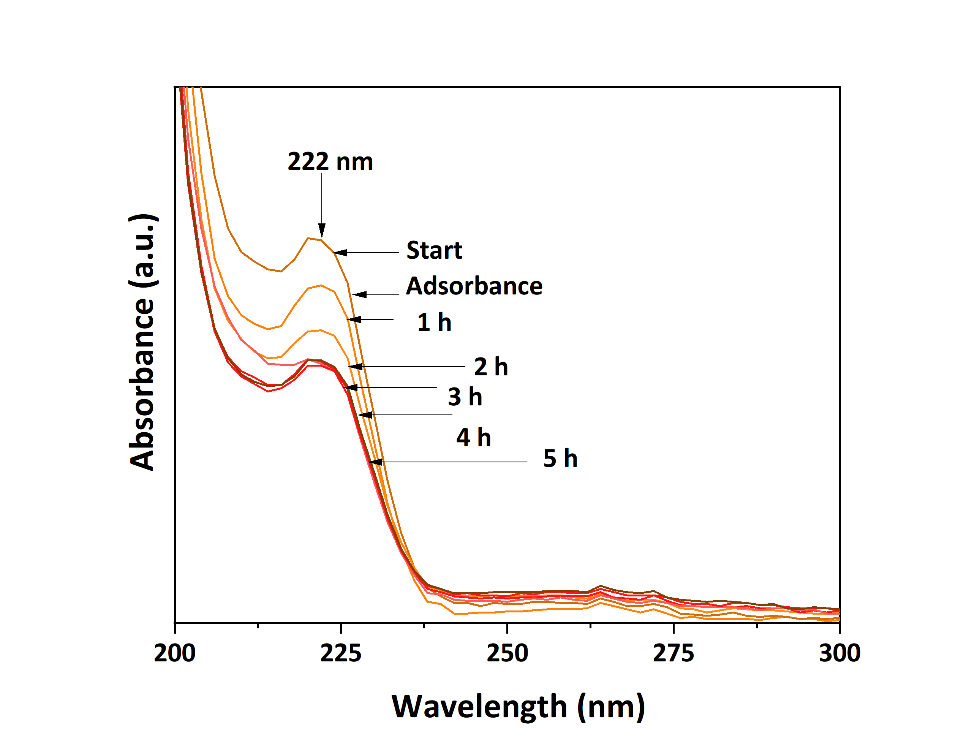


Figure S6 Representative spectrum of the ibuprofen degradation using Co-TiNT under visible light.


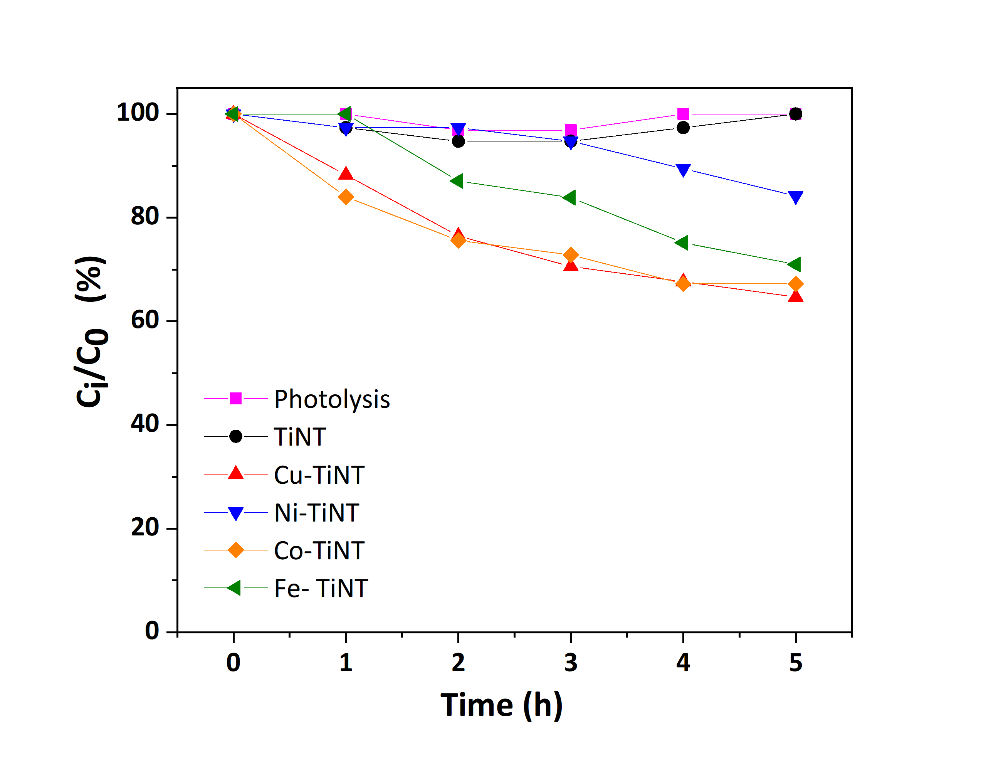


Figure S7. Ibuprofen degradation vs. time under visible light.


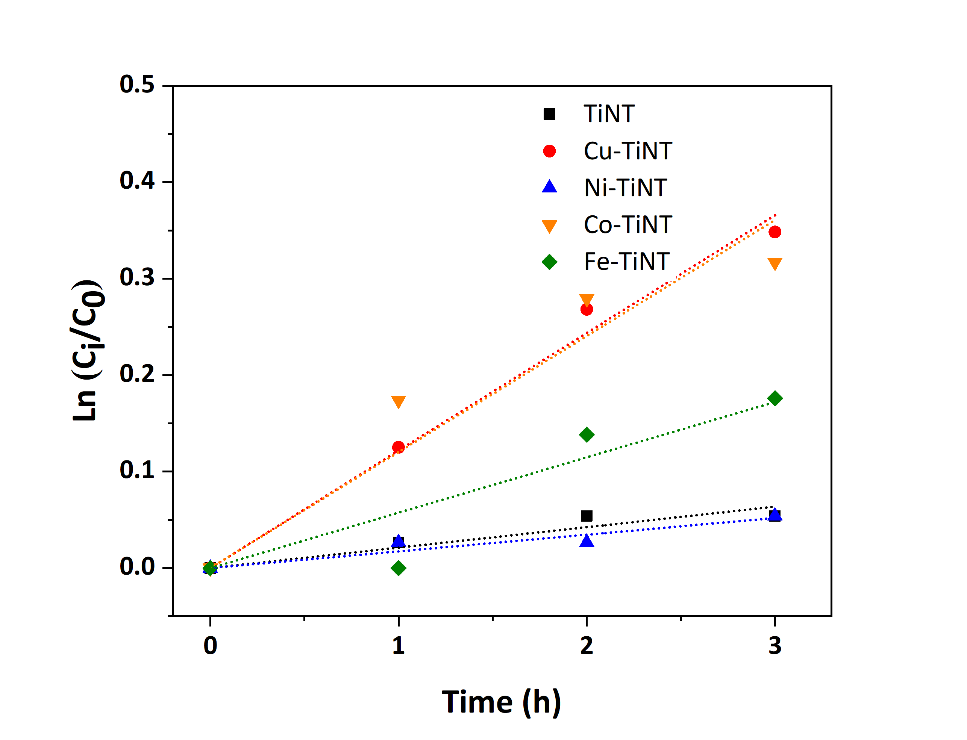


Figure S8 Pseudo first-order kinetic model for the IB decomposition under visible light.


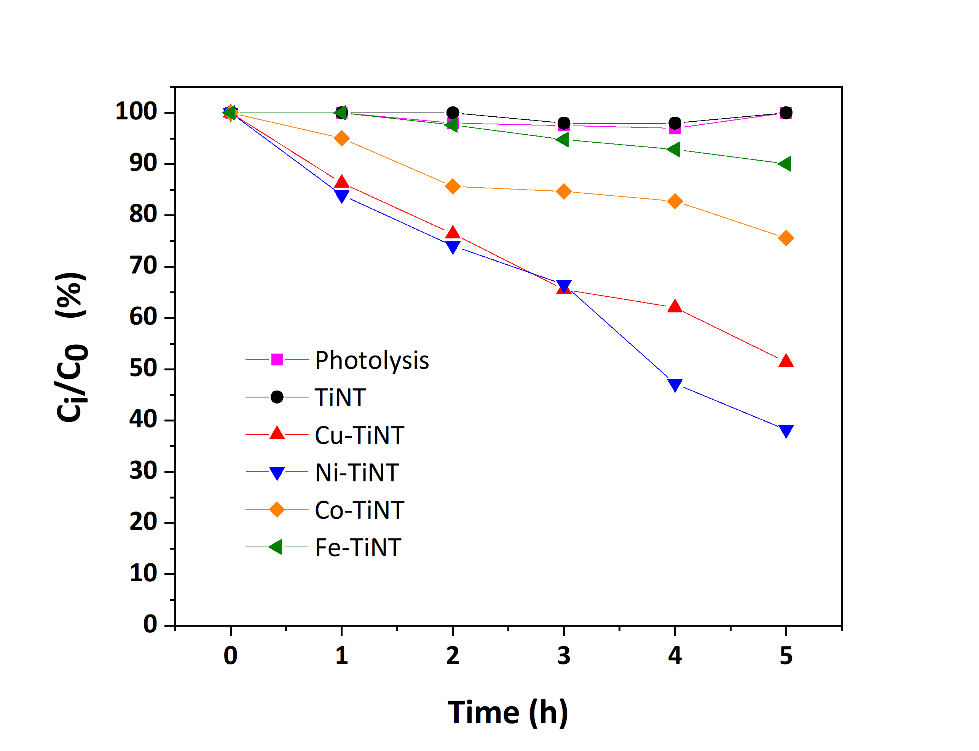


Figure S9. Indigo carmine degradation vs. time under visible light.
